# Supplementary material for: The complete chloroplast genome sequence of wax gourd (Benincasa hispida), and comparative analyses with related species revealing evolutionary dynamics within Benincaseae
Source: Research Square preprint supplement (doi:10.21203/rs.3.rs-1143844/v1), 2022-02-28
Supplement: Supplementary file 1 [file f2f10d9ab13bef9d911ffe27.xlsx]

## Sheet: Sheet1
Species	GenBank accession numbers	genus	tribe	family	order
Begonia coptidifolia	MW080659	Begonia	Begoniaceae	Begoniaceae	Cucurbitales
Begonia pulchrifolia	MN076318	Begonia	Begoniaceae	Begoniaceae	Cucurbitales
Coriaria nepalensis	MT106774	Coriaria	Coriariaceae	Coriariaceae	Cucurbitales
Corynocarpus laevigata	HQ207704	Corynocarpus	Corynocarpaceae	Corynocarpaceae	Cucurbitales
Benincasa hispida	MW362306	Benincasa	Benincaseae	Cucurbitaceae	Cucurbitales
Citrullus colocynthis	NC_035727	Citrullus	Benincaseae	Cucurbitaceae	Cucurbitales
Citrullus lanatus	KY014105	Citrullus	Benincaseae	Cucurbitaceae	Cucurbitales
Cucumis melo	MT622320	Cucumis	Benincaseae	Cucurbitaceae	Cucurbitales
Cucumis sativus	DQ119058	Cucumis	Benincaseae	Cucurbitaceae	Cucurbitales
Lagenaria siceraria var. microcarpa	MT773628	Lagenaria	Benincaseae	Cucurbitaceae	Cucurbitales
Cucumis hystrix	MH427087	Cucumis	Benincaseae	Cucurbitaceae	Cucurbitales
Cucurbita moschata	NC_036506		Cucurbiteae	Cucurbitaceae	Cucurbitales
Cucurbita pepo	NC_038229		Cucurbiteae	Cucurbitaceae	Cucurbitales
Gomphogyne cissiformis var. cissiformis	MH256801		Gomphogyneae	Cucurbitaceae	Cucurbitales
Gynostemma pentaphyllum	KX852298		Gomphogyneae	Cucurbitaceae	Cucurbitales
Gynostemma pubescens	NC_036142		Gomphogyneae	Cucurbitaceae	Cucurbitales
Hemsleya lijiangensis	NC_039653		Gomphogyneae	Cucurbitaceae	Cucurbitales
Momordica charantia isolate OHB3-1	NC_036807		Momordiceae	Cucurbitaceae	Cucurbitales
Luffa aegyptiaca	MT381997		Sicyoeae	Cucurbitaceae	Cucurbitales
Trichosanthes kirilowii	NC_041088		Sicyoeae	Cucurbitaceae	Cucurbitales
Nothoalsomitra suberosa	MN542410		Sicyoeae	Cucurbitaceae	Cucurbitales
Siraitia grosvenorii	MK818498		Siraitieae	Cucurbitaceae	Cucurbitales
Siraitia siamensis	NC_046482		Siraitieae	Cucurbitaceae	Cucurbitales
Libidibia coriaria	NC_026677		Caesalpinia	Fabaceae	Fabales
Glycine max	NC_007942		Phaseoleae	Fabaceae	Fabales
Solanum lycopersicum	NC_007898		Solaneae	Solanaceae	Solanales
